# Supplementary material for: Genomic Comparison of Insect Gut Symbionts from Divergent Burkholderia Subclades
Source: MDPI journal article supplement (doi:10.3390/genes11070744), 2020-07-03
Supplement: s1 [file s1]

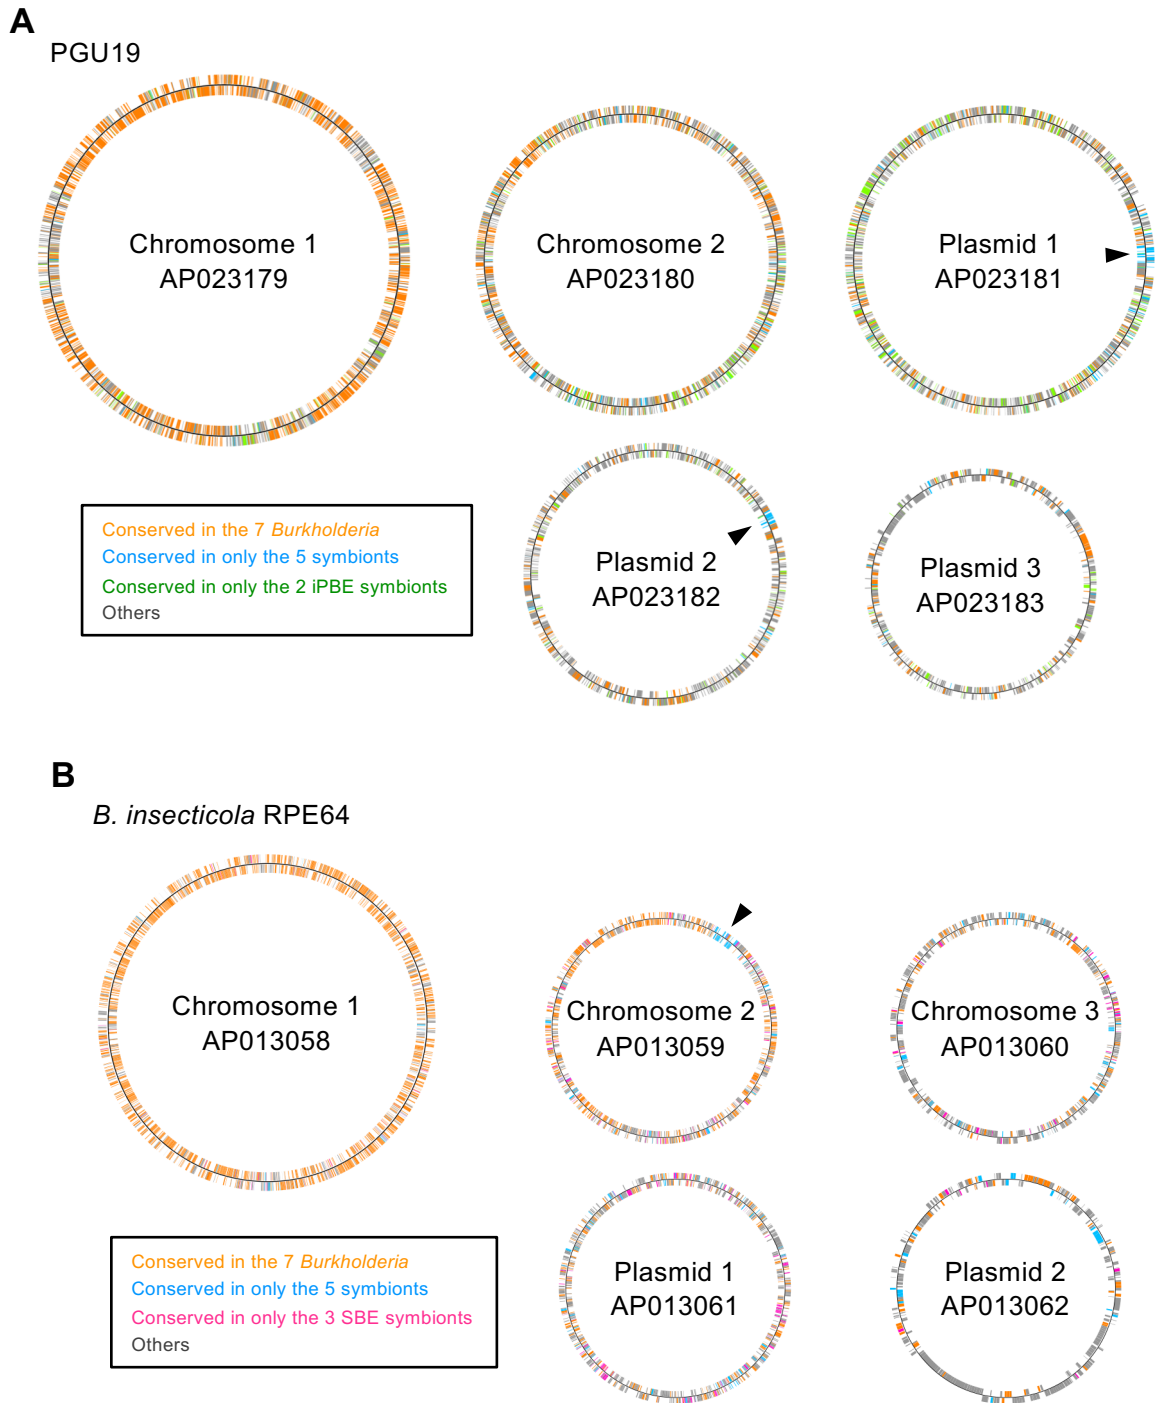

**Figure S1.** The distribution of the conserved genes on the genomes of the iPBE symbiont PGU19 (**A**) and the SBE symbiont *B. insecticola* RPE64 (**B**). The arrow head indicates the region that contains the cluster of conserved genes in the five insect symbionts.
